# Supplementary material for: Assorted functionality-appended UiO-66-NH2for highly efficient uranium(vi) sorption at acidic/neutral/basic pH
Source: Royal Society of Chemistry journal article supplement (doi:10.1039/d0ra00410c), 2020-01-01
Supplement: d0ra00410c1.pdf [file d0ra00410c1.pdf]

# Supporting Information

## Assorted Functionalities Appended UiO-66-NH<sub>2</sub> for Highly Efficient Uranium (VI) Sorption in Acidic/Neutral/Basic pH

*Sarita Tripathi,<sup>‡,\*</sup> B. Sreenivasulu,<sup>‡</sup> A. Suresh,<sup>‡</sup> C. V. S. Brahmmananda Rao<sup>‡</sup> and  
N. Sivaraman<sup>‡,\*</sup>*

<sup>‡</sup>Fuel Chemistry Division, Indira Gandhi Centre for Atomic Research, Kalpakkam, Tamil  
Nadu-603102, India

<sup>‡</sup>Homi Bhabha National Institute (HBNI)

\*Email: sarita17aug@gmail.com

sivaram@igcar.gov.in

## Table of Contents

|                                                                                                                                |        |
|--------------------------------------------------------------------------------------------------------------------------------|--------|
| Table S1: Conversion of UiO-66-NH <sub>2</sub> to different functionalized MOFs                                                | S3     |
| 500 MHz <sup>13</sup> C-NMR spectra (DMSO- <i>d</i> <sub>6</sub> ) of UiO-66-NH <sub>2</sub> and different functionalized MOFs | S4     |
| <sup>31</sup> P NMR (600 MHz, <sup>1</sup> H decoupled) in DMSO- <i>d</i> <sub>6</sub>                                         | S5     |
| SEM and EDX spectra of UiO-66-NH <sub>2</sub> and different functionalized MOFs                                                | S6-S10 |
| Table S2: BET surface area of UiO-66 and different functionalized MOFs                                                         | S11    |
| Effect of pH on U(VI) sorption onto MOFs                                                                                       | S12    |
| Effect of contact time on U(VI) sorption onto MOFs                                                                             | S13-14 |
| Kinetic study                                                                                                                  | S15-16 |
| Powder XRD patterns of recyclability studies                                                                                   | S17    |

**Table S1.** Conversion of UiO-66-NH<sub>2</sub> to different functionalized MOFs

| <b>MOF</b>    | <b>% Conversion</b> |
|---------------|---------------------|
| UiO-66-AM1    | 73.4                |
| UiO-66-AMMal  | 33.3                |
| UiO-66-AMGlu  | 54.1                |
| UiO-66-IMP    | 56.2                |
| UiO-66-SMA    | 68.7                |
| UiO-66-SSA    | 50.2                |
| UiO-66-PO-Ph  | 54.9                |
| UiO-66-PO-OPh | 43.1                |

The percent conversion of the amine groups in the UiO-66-NH<sub>2</sub> to different functionalized MOFs was determined by comparing the relative integrated areas of the aromatic resonances (corresponding to the C-3 position of the BDC ring) between the modified and unmodified BDC ligands.<sup>1</sup>

1. S. J. Garibay and S. M. Cohen, *Chem. Commun.*, 2010, **46**, 7700-7702.

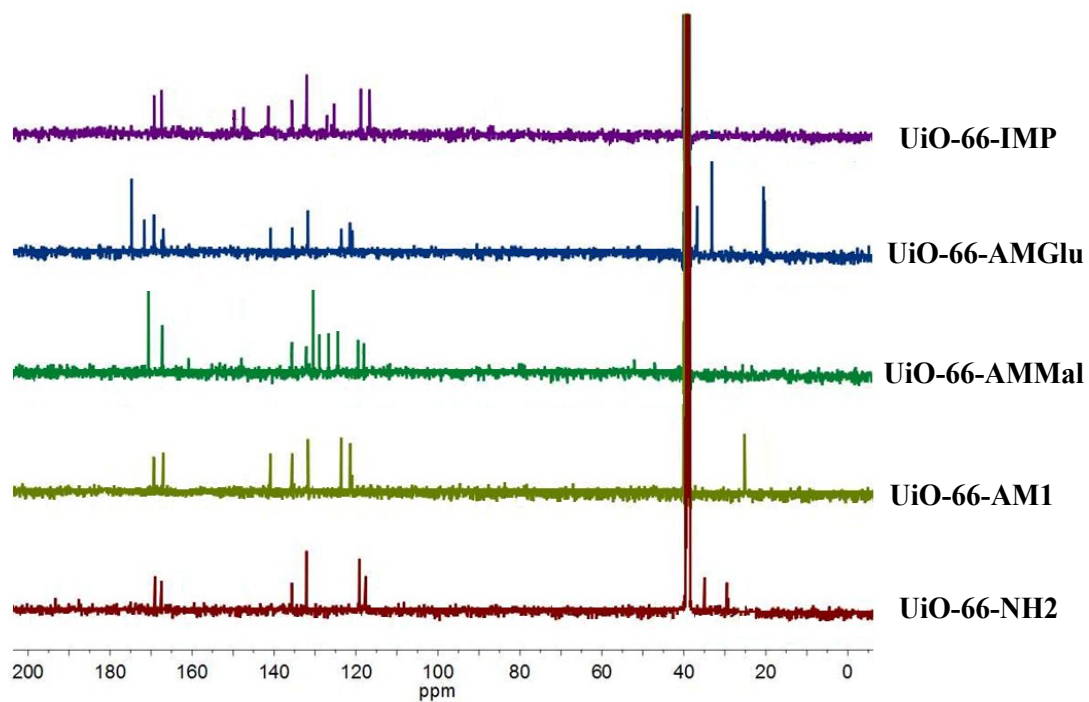

**Figure S1.** 500 MHz  $^{13}\text{C}$ -NMR spectra (DMSO- $d_6$ ) of UiO-66-NH<sub>2</sub> and different functionalized MOFs

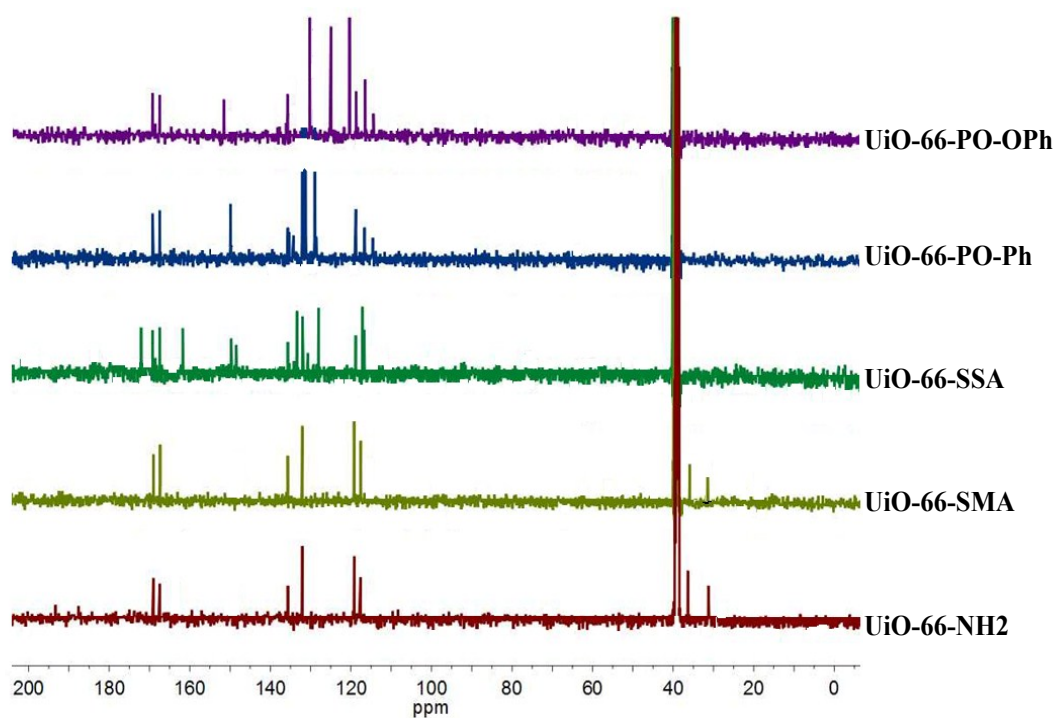

**Figure S2.** 500 MHz  $^{13}\text{C}$ -NMR spectra (DMSO- $d_6$ ) of UiO-66-NH<sub>2</sub> and different functionalized MOFs

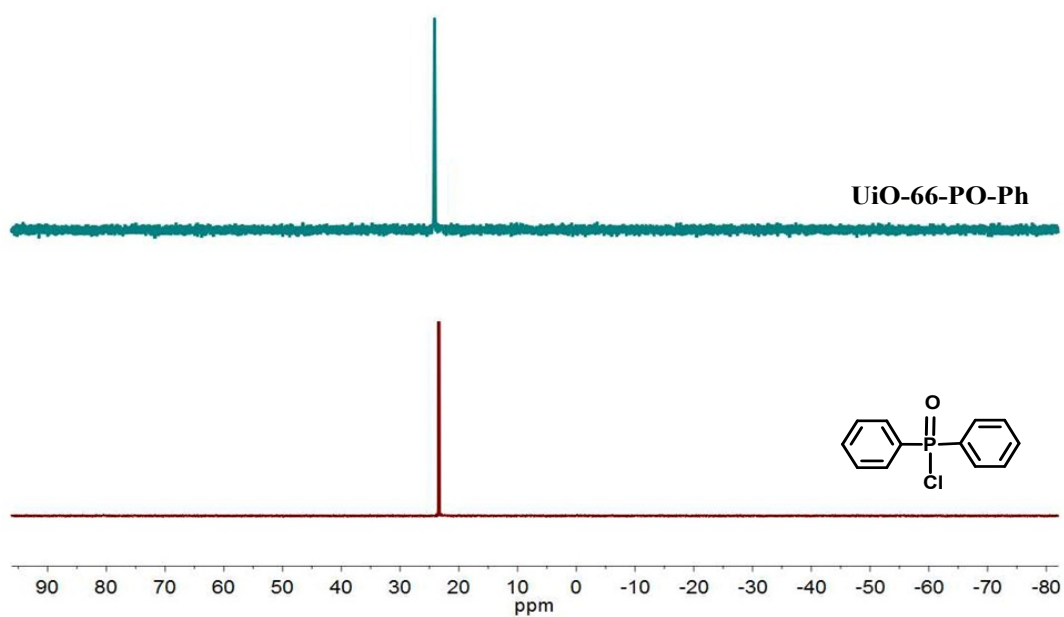

**Figure S3.**  $^{31}\text{P}$  NMR (600 MHz,  $^1\text{H}$  decoupled) in  $\text{DMSO-}d_6$ .

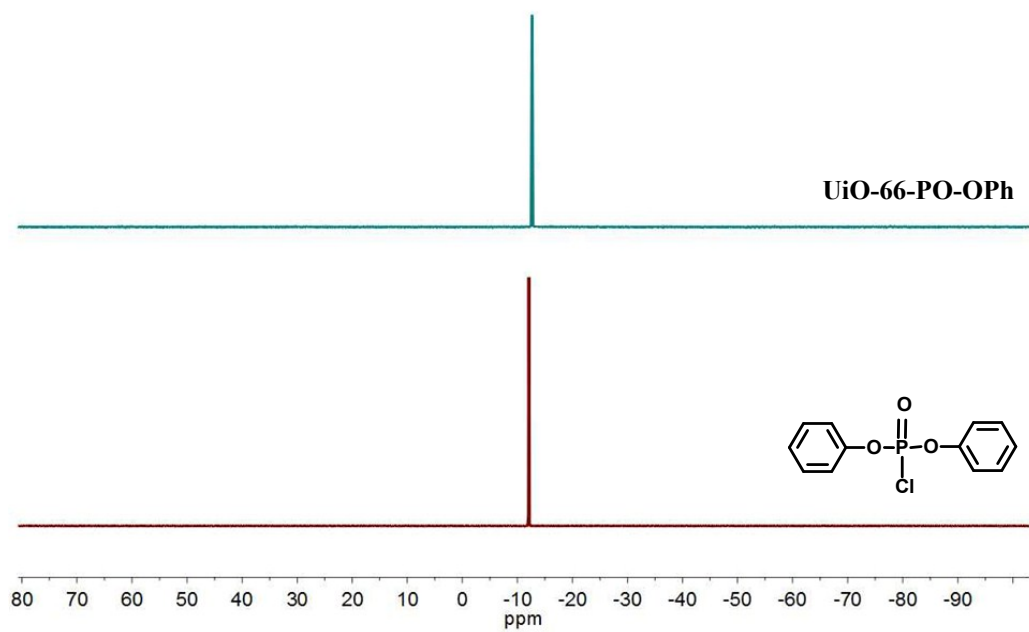

**Figure S4.**  $^{31}\text{P}$  NMR (600 MHz,  $^1\text{H}$  decoupled) in  $\text{DMSO-}d_6$ .

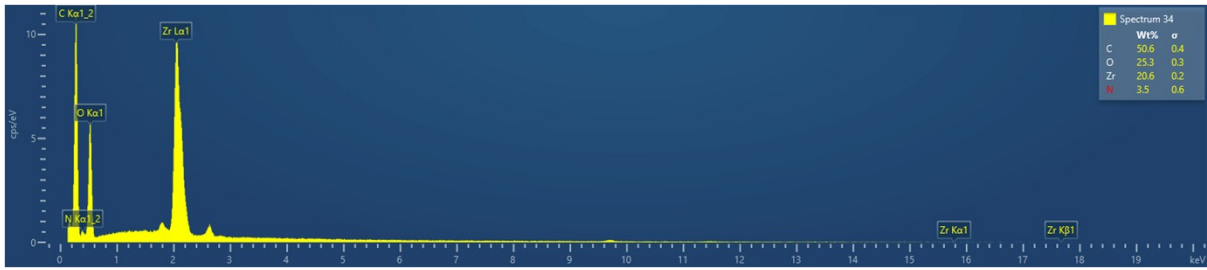

(a)

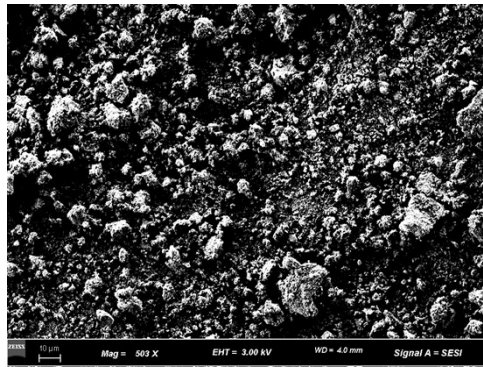

(b)

**Figure S5.** (a) SEM and (b) EDX spectra of UiO-66-NH<sub>2</sub>.

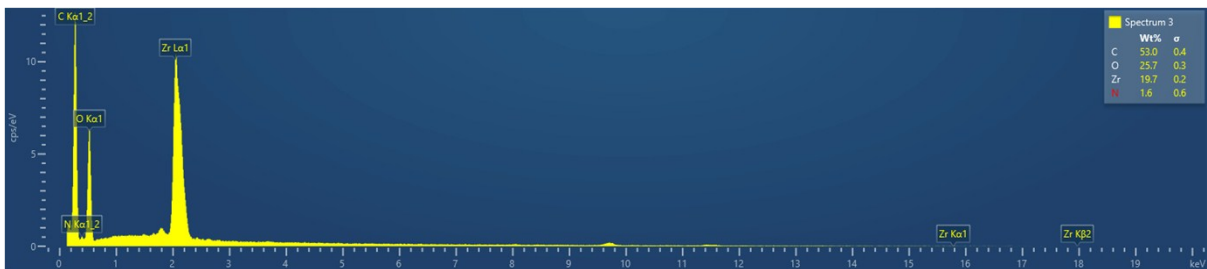

(a)

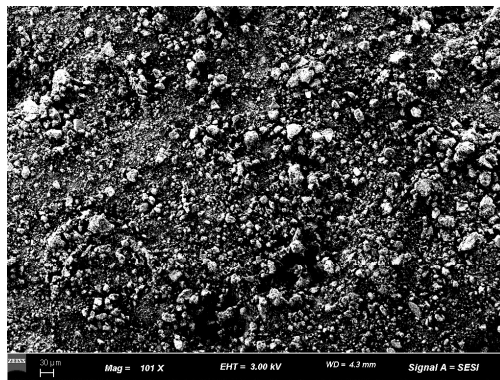

(b)

**Figure S6.** (a) SEM and (b) EDX spectra of UiO-66-AM1.

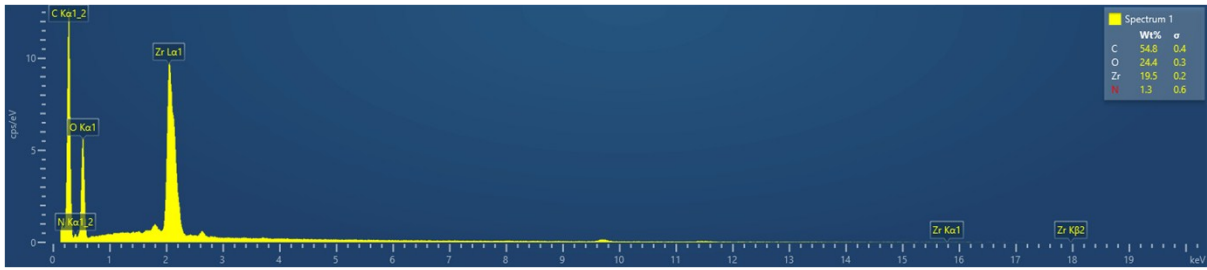

(a)

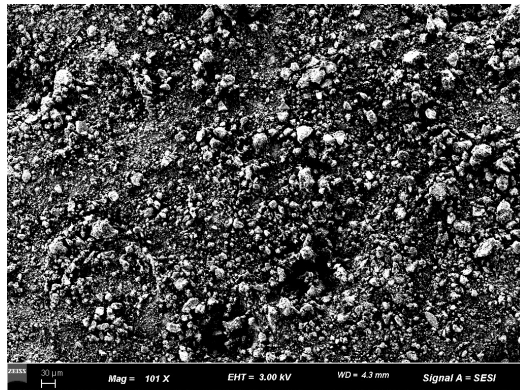

(b)

**Figure S7.** (a) SEM and (b) EDX spectra of UiO-66-AMMal.

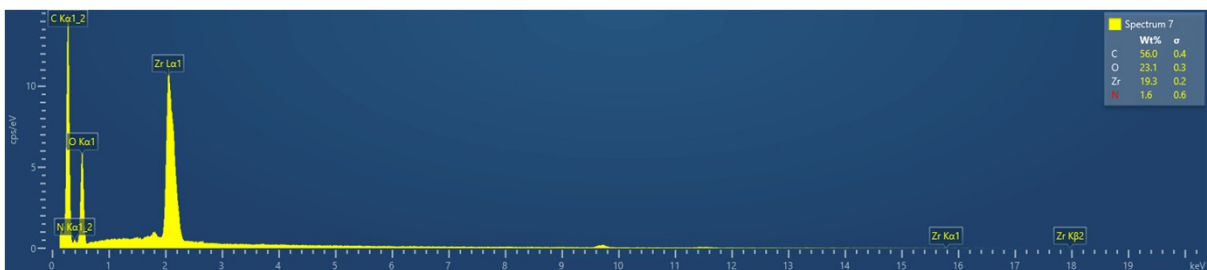

(a)

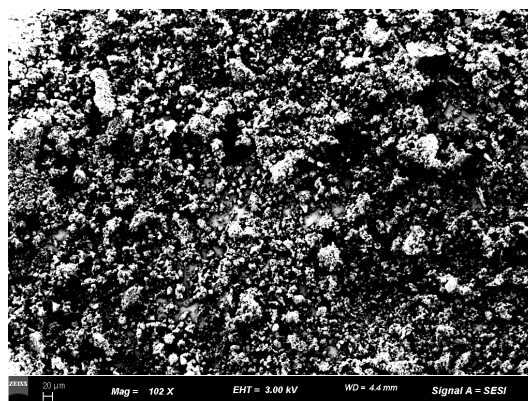

(b)

**Figure S8.** (a) SEM and (b) EDX spectra of UiO-66-AMGlu.



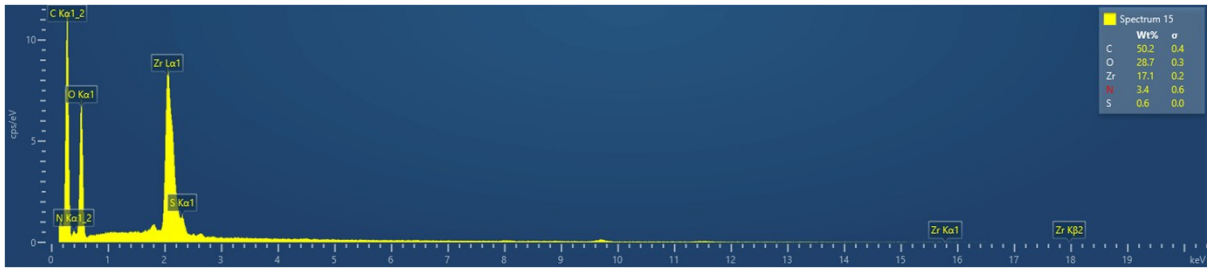

(a)

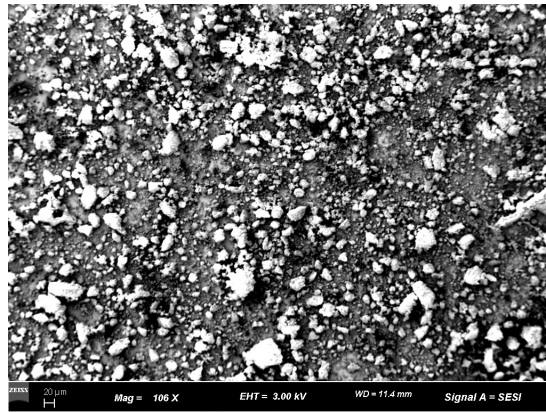

(b)

**Figure S9.** (a) SEM and (b) EDX spectra of UiO-66-SMA.

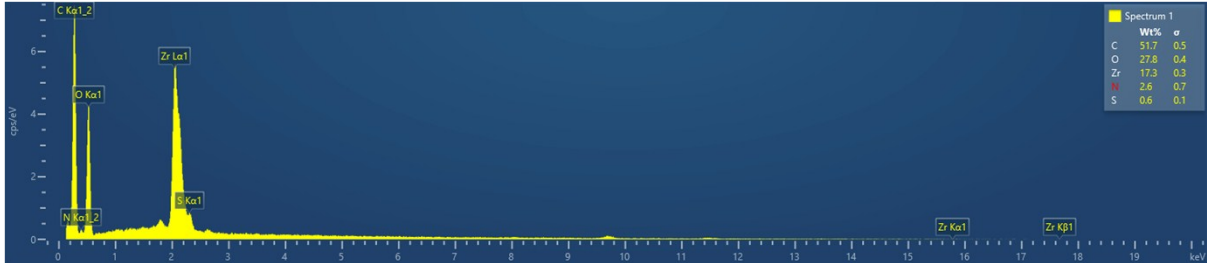

(a)

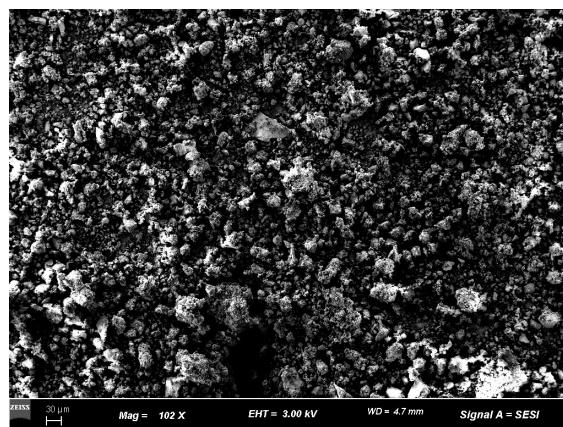

(b)

**Figure S10.** (a) SEM and (b) EDX spectra of UiO-66-SSA.



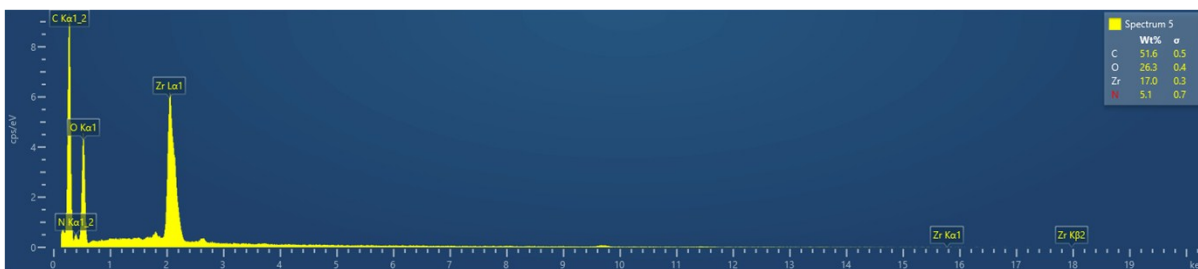

(a)

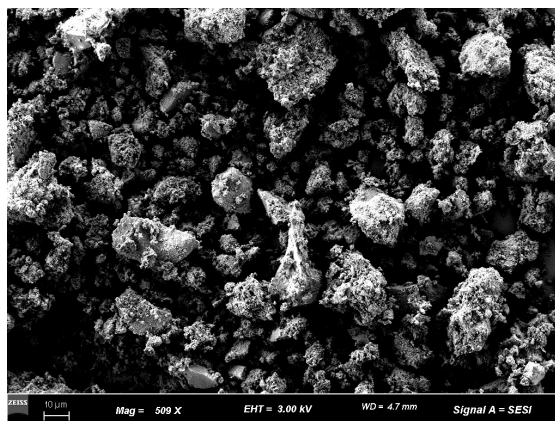

(b)

**Figure S11.** (a) SEM and (b) EDX spectra of UiO-66-IMP.

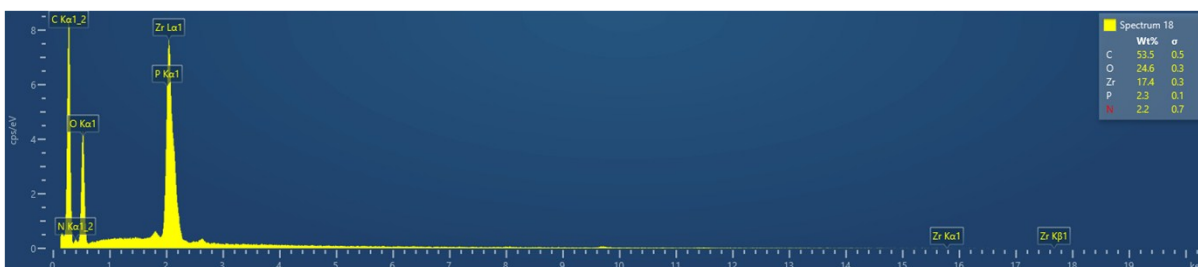

(a)

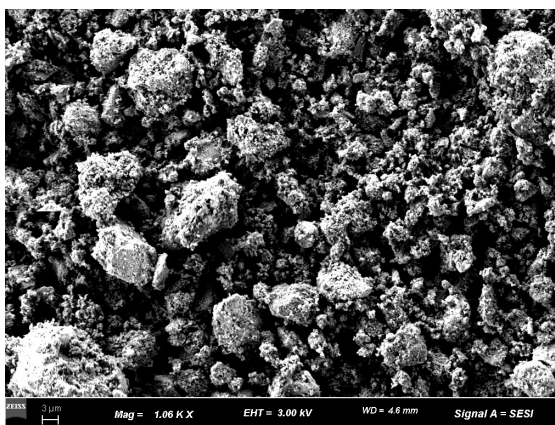

(b)

**Figure S12.** (a) SEM and (b) EDX spectra of UiO-66-PO-Ph.

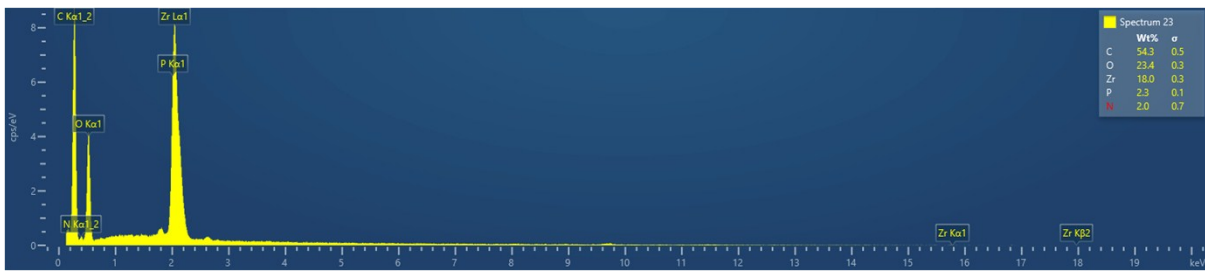

(a)

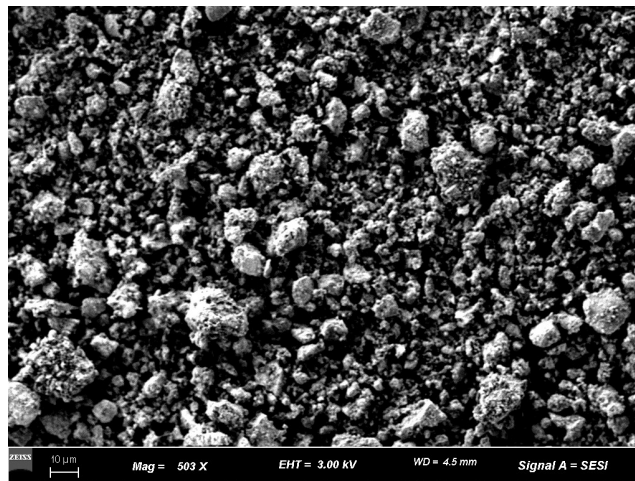

(b)

**Figure S13.** (a) SEM and (b) EDX spectra of UiO-66-PO-OPh.

**Table S2.** BET surface area of UiO-66-NH<sub>2</sub> and different functionalized MOFs

| MOF                    | BET Surface area (m <sup>2</sup> g <sup>-1</sup> ) |
|------------------------|----------------------------------------------------|
| UiO-66-NH <sub>2</sub> | 1112 <sup>1</sup>                                  |
| UiO-66-AM1             | 818 <sup>1</sup>                                   |
| UiO-66-AMMal           | 814 <sup>1</sup>                                   |
| UiO-66-AMGlu           | 531                                                |
| UiO-66-IMP             | 653                                                |
| UiO-66-SMA             | 748                                                |
| UiO-66-SSA             | 595                                                |
| UiO-66-PO-Ph           | 609                                                |
| UiO-66-PO-OPh          | 574                                                |

1. Garibay, S. J.; Cohen, S. M. *Chem. Commun.* **2010**, *46*, 7700-7702.

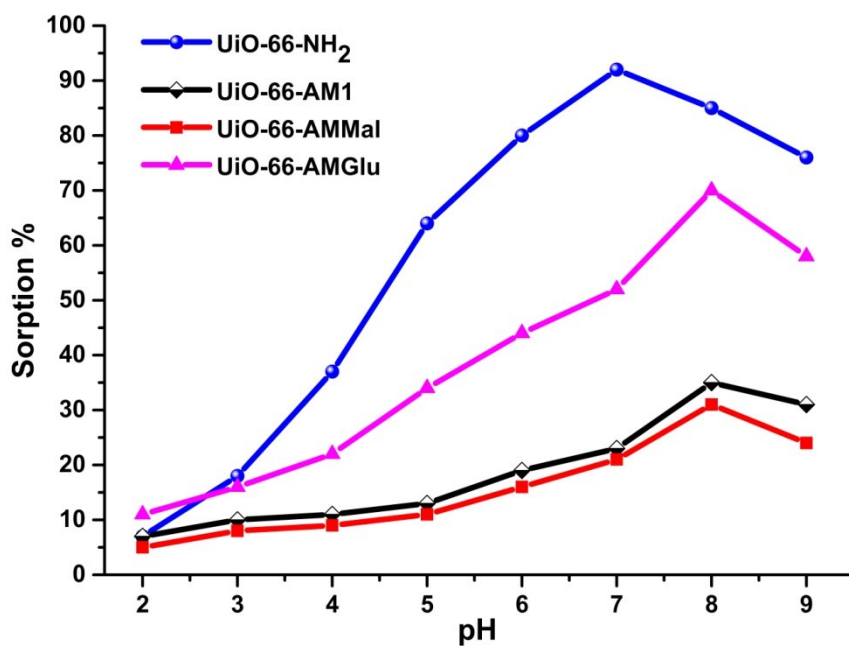

**Figure S14.** Effect of pH on uranyl ion sorption onto UiO-66-NH<sub>2</sub>, UiO-66-AM1, UiO-66-AMMal and UiO-66-AMGlu;  $t = 120$  min,  $m_{\text{sorbent}} = 10.0$  mg,  $V_{\text{solution}} = 3$  mL,  $C_0 = 500$  mg L<sup>-1</sup>,  $T = 25 \pm 0.5$  °C.

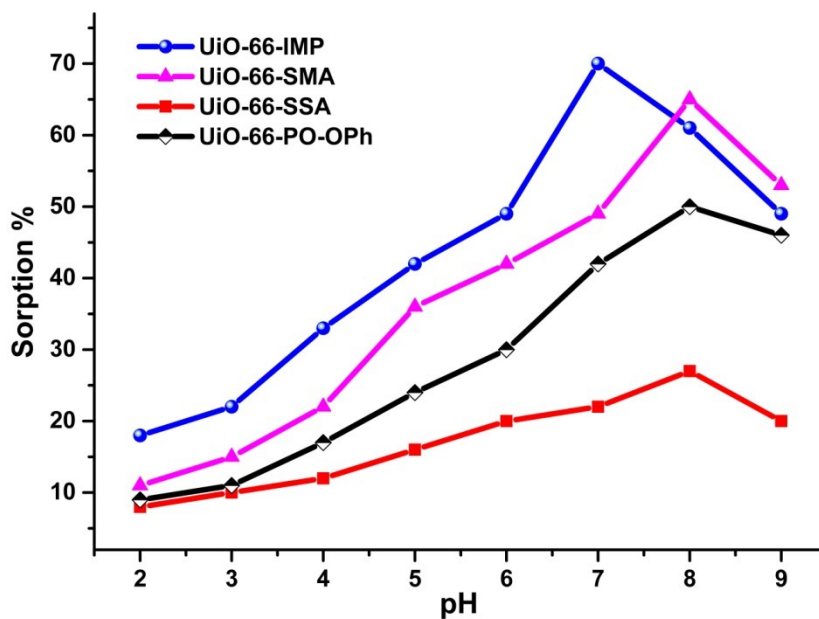

**Figure S15.** Effect of pH on uranyl ion sorption onto UiO-66-IMP, UiO-66-SMA, UiO-66-SSA and UiO-66-PO-OPh;  $t = 120$  min,  $m_{\text{sorbent}} = 10.0$  mg,  $V_{\text{solution}} = 3$  mL,  $C_0 = 500$  mg L<sup>-1</sup>,  $T = 25 \pm 0.5$  °C.

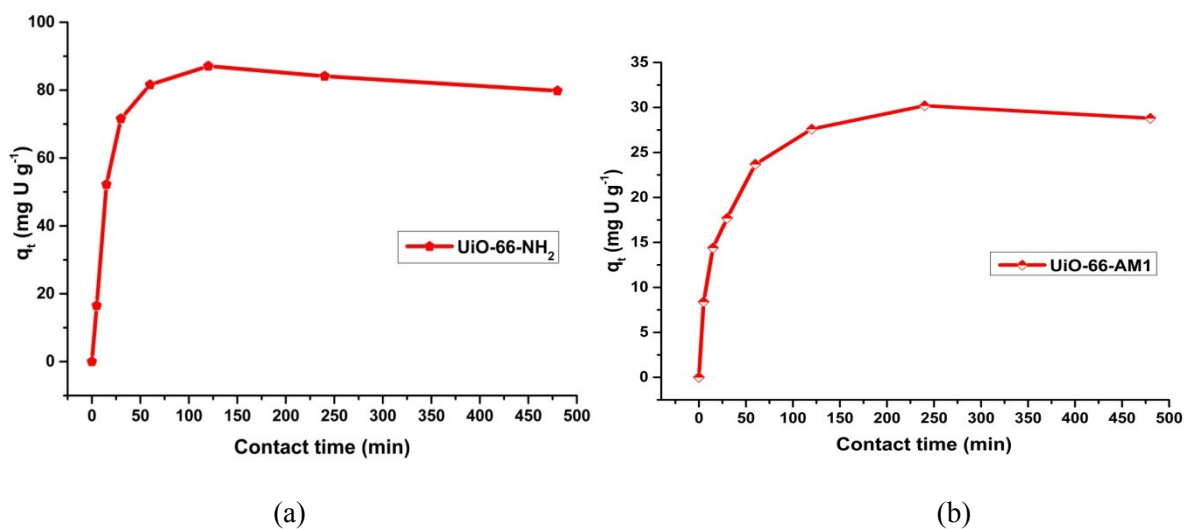

**Figure S16.** Effect of contact time on uranyl ion sorption onto (a) UiO-66-NH<sub>2</sub> (pH = 7), (b) UiO-66-AM1 (pH = 8);  $m_{\text{sorbent}} = 10.0$  mg;  $V_{\text{solution}} = 3$  mL;  $C_0 = 500$  mg L<sup>-1</sup>;  $T = 25 \pm 0.5$  °C.

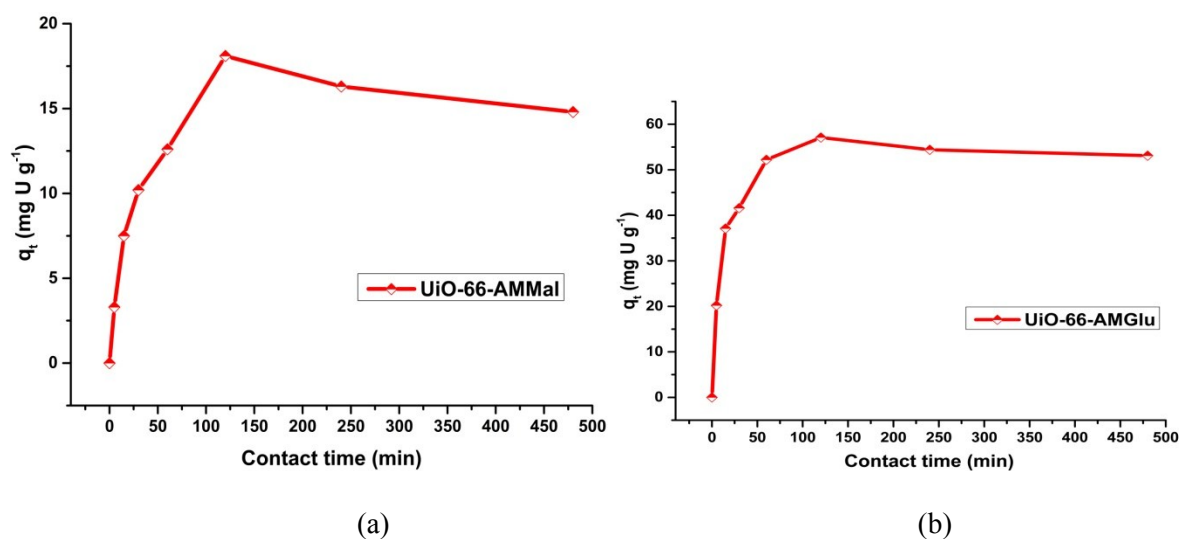

**Figure S17.** Effect of contact time on uranyl ion sorption onto (a) UiO-66-AMMal (pH = 8), (b) UiO-66-AMGlu (pH = 8);  $m_{\text{sorbent}} = 10.0$  mg;  $V_{\text{solution}} = 3$  mL;  $C_0 = 500$  mg L<sup>-1</sup>;  $T = 25 \pm 0.5$  °C.

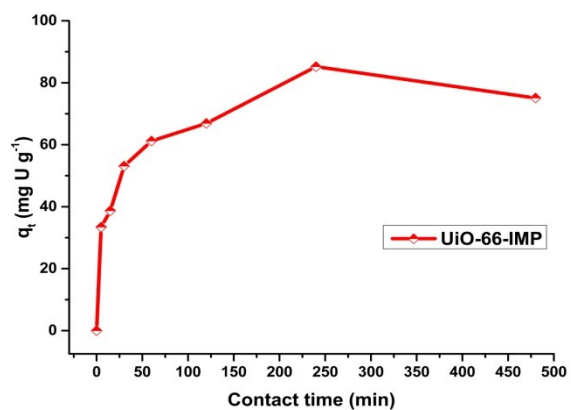

(a)

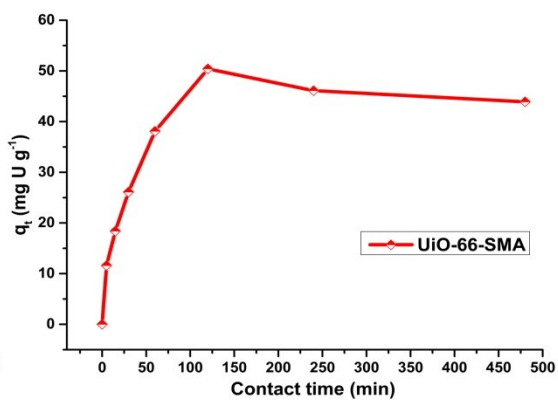

(b)

**Figure S18.** Effect of contact time on uranyl ion sorption onto (a) UiO-66-IMP (pH = 7), (b) UiO-66-SMA (pH = 8);  $m_{\text{sorbent}} = 10.0$  mg;  $V_{\text{solution}} = 3$  mL;  $C_0 = 500$  mg L<sup>-1</sup>;  $T = 25 \pm 0.5$  °C.

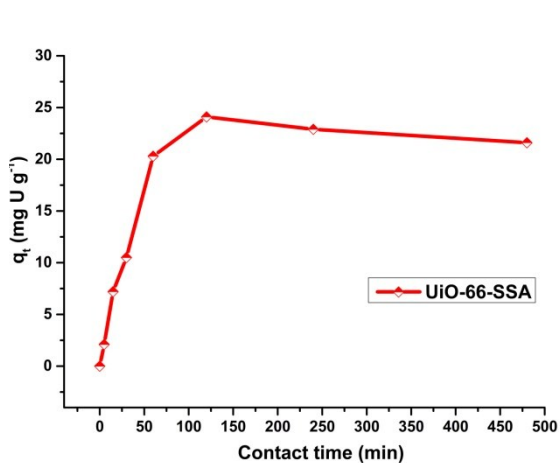

(a)

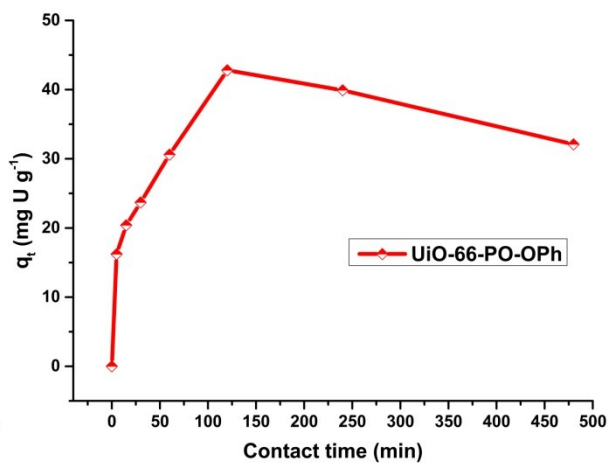

(b)

**Figure S19.** Effect of contact time on uranyl ion sorption onto (a) UiO-66-SSA (pH = 8), (b) UiO-66-PO-OPh (pH = 8);  $m_{\text{sorbent}} = 10.0$  mg;  $V_{\text{solution}} = 3$  mL;  $C_0 = 500$  mg L<sup>-1</sup>;  $T = 25 \pm 0.5$  °C.



## Kinetic model

The linear form of the pseudo-second-order kinetic model is expressed as follows:

$$\frac{t}{q_t} = \frac{1}{K_2 q_e^2} + \frac{t}{q_e}$$

Where  $q_e$  ( $\text{mg}\cdot\text{g}^{-1}$ ) and  $q_t$  ( $\text{mg}\cdot\text{g}^{-1}$ ) are the amounts of the uranium absorption at equilibrium and at time  $t$ , respectively. And  $K_2$  ( $\text{g}\cdot\text{mg}^{-1}\cdot\text{min}^{-1}$ ) is the pseudo-second-order sorption rate constant. The model parameters and the correlation coefficient obtained are shown in Table S2.

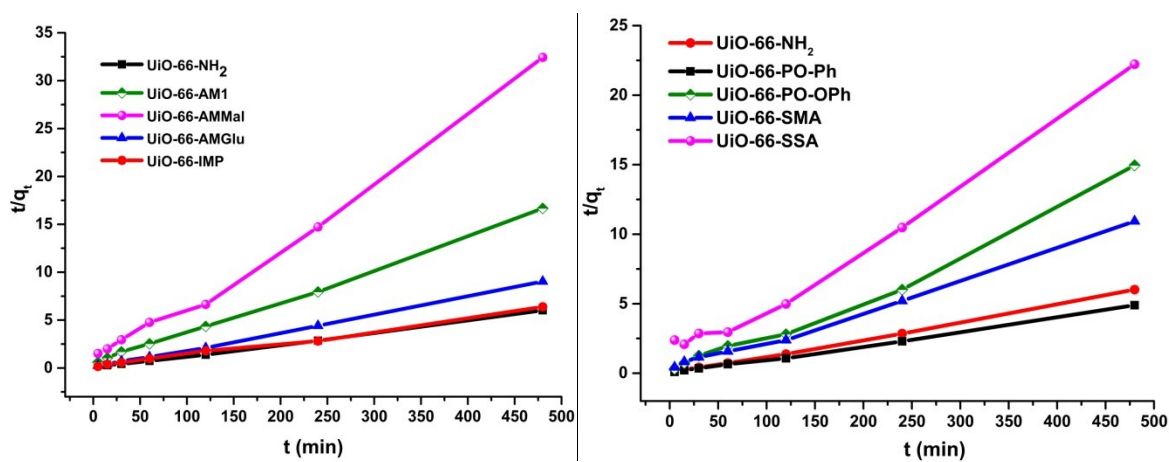

**Figure S20.** Pseudo-second-order model fits for the kinetic rate on the sorbent.

**Table S3.** Kinetic parameters for uranyl ion sorption on the MOF

| Pseudo-second-order kinetic model |                             |                                                |                |
|-----------------------------------|-----------------------------|------------------------------------------------|----------------|
| MOF                               | $q_e$ (mg·g <sup>-1</sup> ) | $K_2$ (g·mg <sup>-1</sup> ·min <sup>-1</sup> ) | R <sup>2</sup> |
| UiO-66-PO-Ph                      | 105.4                       | 0.0029                                         | 0.996          |
| UiO-66-NH <sub>2</sub>            | 82.1                        | 0.0058                                         | 0.991          |
| UiO-66-IMP                        | 78.3                        | 0.0014                                         | 0.992          |
| UiO-66-AMGlu                      | 53.0                        | 0.00185                                        | 0.998          |
| UiO-66-SMA                        | 46.4                        | 0.00217                                        | 0.993          |
| UiO-66-PO-OPh                     | 36.1                        | 0.0029                                         | 0.981          |
| UiO-66-AM1                        | 27.2                        | 0.0033                                         | 0.997          |
| UiO-66-AMMal                      | 23.1                        | 0.0064                                         | 0.989          |
| UiO-66-SSA                        | 21.4                        | 0.0042                                         | 0.982          |

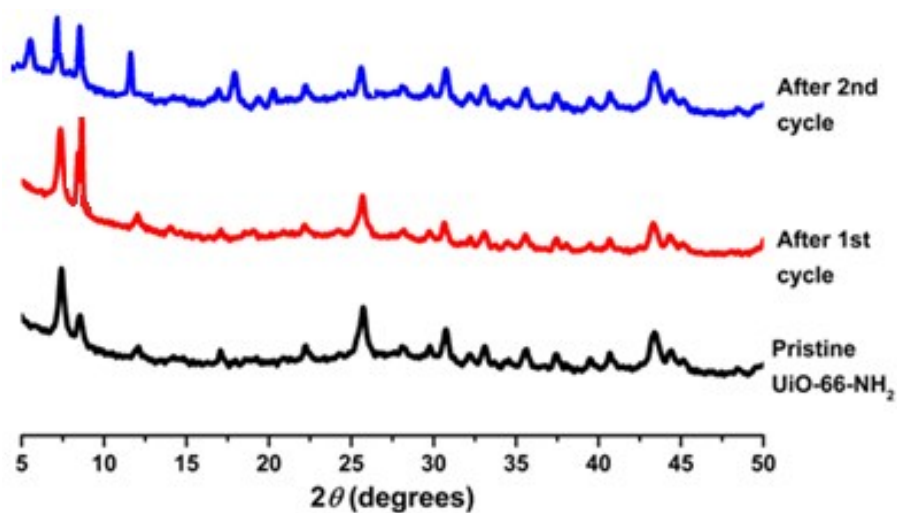

**Figure S21.** Powder XRD pattern of pristine UiO-66-NH<sub>2</sub> and after two cycles of uranyl ion sorption.

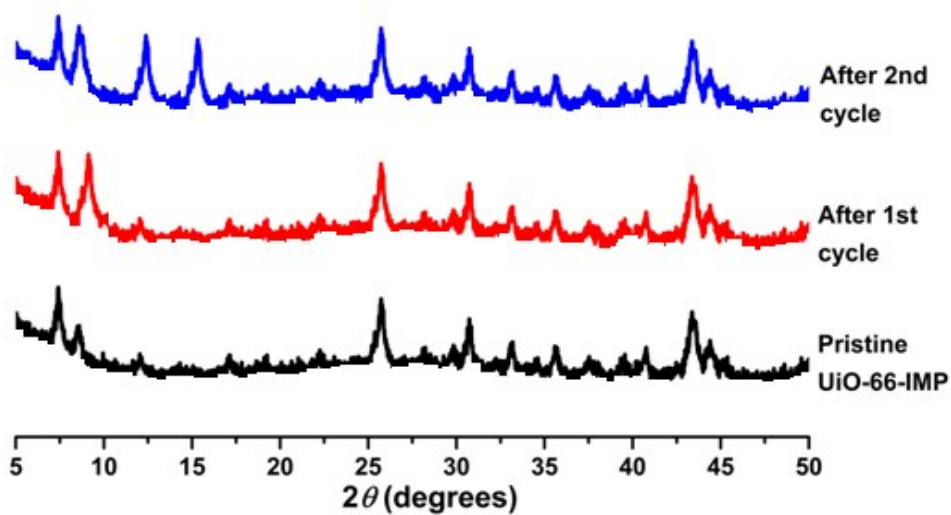

**Figure S22.** Powder XRD pattern of pristine UiO-66-IMP and after two cycles of uranyl ion sorption.

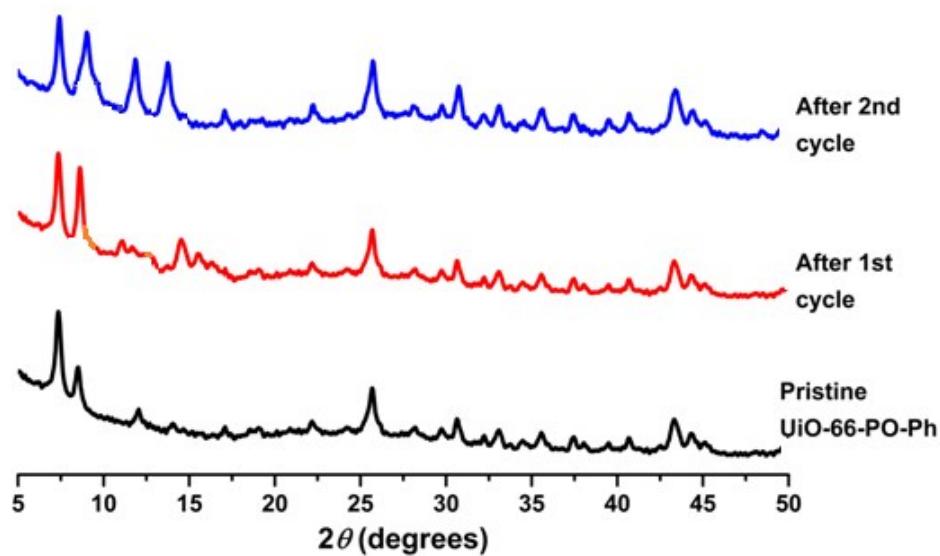

**Figure S23.** Powder XRD pattern of pristine UiO-66-PO-Ph and after two cycles of uranyl ion sorption.
